# Supplementary material
Source: Springer Nature journal article supplement (https://www.springermedizin.de/resource/supplementary/12913_2013_3182_MOESM1_ESM.pdf/9532608)
Supplement: MOESM1 [file 9532608]

**Demographics, clinical characteristics, health resource utilization and cost of chronic thromboembolic pulmonary hypertension patients: retrospective results from six European countries**

List of involved ethic committees and review boards by country

| <b>EC/ Institution</b>                                                                                                                                                                                                                                                                                                                                                             | <b>Action</b>                                                                                                                        |
|------------------------------------------------------------------------------------------------------------------------------------------------------------------------------------------------------------------------------------------------------------------------------------------------------------------------------------------------------------------------------------|--------------------------------------------------------------------------------------------------------------------------------------|
| <p><i>France</i><br/>           CNIL (Commission Nationale de l'Informatique et des Libertés, Paris<br/>           CNOM (Conseil National de l'Ordre des Médecins), Paris<br/>           CCTIRS (Comité consultatif sur le traitement de l'information en matière de recherche dans le domaine de la santé)</p>                                                                    | <p>approved data privacy<br/>           approved contracts and fees<br/>           approved justification of the data collection</p> |
| <p><i>Spain</i><br/>           CEIC Galicia<br/>           CEIC Hospital Universitario La Fe<br/>           CEIC Hospital Universitario San Cecilio<br/>           CEIC Illes Balears</p>                                                                                                                                                                                          | <p>approved<br/>           approved<br/>           approved<br/>           approved</p>                                              |
| <p><i>Italy</i><br/>           Comitato Etico Indipendente Azienda Ospedaliero-Universitaria Degli Ospedali Riuniti Di Trieste<br/>           Comitato Etico dell'Azienda Ospedaliera Vincenzo Monaldi, Napoli<br/>           Comitato di Bioetica dell'Azienda Ospedaliera Ospedali Riuniti di Bergamo<br/>           Comitato Etico dell'Azienda Policlinico Umberto I, Roma</p> | <p>approved<br/>           approved<br/>           approved<br/>           approved</p>                                              |
| <p><i>United Kingdom</i><br/>           NHS Greater Glasgow and Clyde, West of Scotland Research Ethics Committee 4</p>                                                                                                                                                                                                                                                            | <p>Decision: approval not required under NHS arrangements</p>                                                                        |
| <p><i>Sweden</i><br/>           Regionala etikprövningsnämnden i Göteborg</p>                                                                                                                                                                                                                                                                                                      | <p>approved</p>                                                                                                                      |
| <p><i>Germany</i><br/>           Ethikkommission der Universität Greifswald<br/>           Ethikkommission der Universität Dresden<br/>           Ethikkommission der Medizinische Hochschule Hannover</p>                                                                                                                                                                         | <p>approved<br/>           notified<br/>           notified</p>                                                                      |
